# Supplementary material for: Climate change and the global redistribution of biodiversity: substantial variation in empirical support for expected range shifts
Source: PubMed Central journal article supplement (PMC11378804; doi:10.1186/s13750-023-00296-0), 2023-04-11
Supplement: 13750_2023_296_MOESM6_ESM.pdf [file 13750_2023_296_MOESM6_ESM.pdf]

| Section/sub-section                | Topic                                            | Description                                                                                                                                                                                                          | Further explanation                                                                                                                                                                     | Checklist/meta-data | Author response                                                                                                                                                                                                                                                     | Comments                                                                                                                 |
|------------------------------------|--------------------------------------------------|----------------------------------------------------------------------------------------------------------------------------------------------------------------------------------------------------------------------|-----------------------------------------------------------------------------------------------------------------------------------------------------------------------------------------|---------------------|---------------------------------------------------------------------------------------------------------------------------------------------------------------------------------------------------------------------------------------------------------------------|--------------------------------------------------------------------------------------------------------------------------|
| Title                              | Title                                            | The title must indicate that it is a systematic review, and should indicate                                                                                                                                          | The title should normally be the same or very similar to the review                                                                                                                     | Meta-data           | Climate change and the                                                                                                                                                                                                                                              |                                                                                                                          |
| Type of review                     | Type of review                                   | Select one of the following types of review: systematic review,                                                                                                                                                      | See CEE Guidance on amendments and updates [1]                                                                                                                                          | Meta-data           | systematic review                                                                                                                                                                                                                                                   |                                                                                                                          |
| Authors' contacts                  | Authors' contacts                                | The full names, institutional addresses and email addresses for all                                                                                                                                                  |                                                                                                                                                                                         | Checklist           | Yes                                                                                                                                                                                                                                                                 |                                                                                                                          |
| Abstract                           | Structured summary                               | The abstract of the manuscript must not exceed 500 words and must be                                                                                                                                                 |                                                                                                                                                                                         | Checklist           | Yes                                                                                                                                                                                                                                                                 |                                                                                                                          |
| Background                         | Background                                       | Describe the rationale for the review in the context of what is already                                                                                                                                              | A theory of change and/or conceptual model should be presented that                                                                                                                     | Checklist           | Yes                                                                                                                                                                                                                                                                 |                                                                                                                          |
| Stakeholder engagement             | Stakeholder engagement                           | The actual role of stakeholders throughout the review process (e.g. in                                                                                                                                               |                                                                                                                                                                                         | Checklist           | Yes                                                                                                                                                                                                                                                                 |                                                                                                                          |
| Objective of the review            | Objective                                        | Describe the primary question and secondary questions (when                                                                                                                                                          | The primary question is the main question of the review. The secondary                                                                                                                  | Checklist           | Yes                                                                                                                                                                                                                                                                 |                                                                                                                          |
|                                    | Definition of the question components            | Provide reference to the question key elements, e.g. population(s), intervention(s)/exposure(s), comparator(s), and outcome(s).                                                                                      | For other question types see [3,4]                                                                                                                                                      | Meta-data           | Table 1 outlines all elements of the PECO framework for our study. Rubenstein, Madeleine A., et al. "Do empirical observations support commonly-held climate change range shift hypotheses? A systematic review protocol." Environmental Evidence 9.1 (2020): 1-10. |                                                                                                                          |
| Methods                            | Protocol                                         | Provide citation, DOI or open-access link to published protocol.                                                                                                                                                     | The protocol should be peer-reviewed and publicly available online (open access).                                                                                                       | Meta-data           | Yes                                                                                                                                                                                                                                                                 |                                                                                                                          |
|                                    | Deviations from protocol                         | Describe any ways in which the final methods of the review deviate from                                                                                                                                              |                                                                                                                                                                                         | Checklist           | Yes                                                                                                                                                                                                                                                                 |                                                                                                                          |
| Searches                           | Search strategy                                  | Detail the search strategy used, including: database names accessed,                                                                                                                                                 |                                                                                                                                                                                         | Checklist           | Yes                                                                                                                                                                                                                                                                 |                                                                                                                          |
|                                    | Search string                                    | Provide Boolean-style full search string and state the platform for which the string is formatted (e.g. Web of Science format)                                                                                       |                                                                                                                                                                                         | Meta-data           | TS=(("climate" OR "global 204 warming" OR "temperature" OR "precipitation") AND ("range" OR "distribution" OR "habitat 205 extent" OR "occupancy") AND ("species"))                                                                                                 |                                                                                                                          |
|                                    | Languages - bibliographic                        | List languages used in bibliographic database searches                                                                                                                                                               |                                                                                                                                                                                         | Meta-data           | English                                                                                                                                                                                                                                                             |                                                                                                                          |
|                                    | Languages – grey literature                      | List languages used in organisational website searches and web-based                                                                                                                                                 |                                                                                                                                                                                         | Meta-data           | English                                                                                                                                                                                                                                                             |                                                                                                                          |
|                                    | Bibliographic databases                          | Provide the number of bibliographic databases searched                                                                                                                                                               |                                                                                                                                                                                         | Meta-data           | Included in our "search engine" section. We are using 2 bibliographic database - Web of Science and Scopus                                                                                                                                                          |                                                                                                                          |
|                                    | Web-based search engines                         | Provide the number of web-based search engines searched                                                                                                                                                              |                                                                                                                                                                                         | Meta-data           | Included in our "search engine" section. We are using 1 web based search engine - Google Scholar                                                                                                                                                                    |                                                                                                                          |
|                                    | Organisational websites                          | Provide the number of organisational websites searched                                                                                                                                                               |                                                                                                                                                                                         | Meta-data           | Not performed                                                                                                                                                                                                                                                       |                                                                                                                          |
|                                    | Estimating comprehensiveness of Search update    | Describe the process by which the comprehensiveness of the search                                                                                                                                                    |                                                                                                                                                                                         | Checklist           | Yes                                                                                                                                                                                                                                                                 |                                                                                                                          |
| Article screening and study        | Screening strategy                               | Describe any update to searches undertaken during the conduct of the                                                                                                                                                 | Compulsory (if update performed). A search update is good practice if                                                                                                                   | Checklist           | Yes                                                                                                                                                                                                                                                                 |                                                                                                                          |
|                                    | Inclusion criteria                               | Describe the methodology for screening articles/studies for relevance.                                                                                                                                               |                                                                                                                                                                                         | Checklist           | Yes                                                                                                                                                                                                                                                                 |                                                                                                                          |
| Critical appraisal                 | Critical appraisal strategy                      | Describe the inclusion criteria used to assess relevance of identified                                                                                                                                               |                                                                                                                                                                                         | Checklist           | Yes                                                                                                                                                                                                                                                                 |                                                                                                                          |
|                                    | Critical appraisal used in synthesis             | Describe here the method used for critical appraisal of study validity                                                                                                                                               |                                                                                                                                                                                         | Checklist           | Yes                                                                                                                                                                                                                                                                 |                                                                                                                          |
| Data extraction                    | Meta-data extraction and coding                  | Describe how the information from critical appraisal was used in                                                                                                                                                     | Optional, a map database can be included within a systematic review                                                                                                                     | Checklist           | Yes                                                                                                                                                                                                                                                                 |                                                                                                                          |
|                                    | Data extraction strategy                         | Describe the method for meta-data extraction and coding for studies,                                                                                                                                                 |                                                                                                                                                                                         | Checklist           | Yes                                                                                                                                                                                                                                                                 |                                                                                                                          |
|                                    | Approaches to missing data                       | Describe the method for extraction of qualitative and/or quantitative                                                                                                                                                |                                                                                                                                                                                         | Checklist           | Yes                                                                                                                                                                                                                                                                 |                                                                                                                          |
| Potential effect modifiers/reasons | Potential effect modifiers/reasons               | Describe any process for obtaining and confirming missing or unclear                                                                                                                                                 |                                                                                                                                                                                         | Checklist           | Yes                                                                                                                                                                                                                                                                 |                                                                                                                          |
|                                    | Potential effect modifiers/reasons               | Provide a list of and justification for the effect modifiers/reasons for                                                                                                                                             |                                                                                                                                                                                         | Checklist           | Yes                                                                                                                                                                                                                                                                 |                                                                                                                          |
| Data synthesis and presentation    | Type of synthesis                                | State the type of synthesis conducted as part of the systematic review (narrative only, narrative and quantitative, narrative and qualitative, narrative, qualitative and quantitative, narrative and mixed-methods) |                                                                                                                                                                                         | Meta-data           | Narrative, quantitative, and qualitative                                                                                                                                                                                                                            |                                                                                                                          |
|                                    | Narrative synthesis strategy                     | Describe methods used for narratively synthesising the evidence base in                                                                                                                                              |                                                                                                                                                                                         | Checklist           | Yes                                                                                                                                                                                                                                                                 |                                                                                                                          |
|                                    | Quantitative synthesis strategy                  | If data are appropriate for quantitative synthesis, describe methods for                                                                                                                                             | Compulsory (if quantitative synthesis performed)                                                                                                                                        | Checklist           | Yes                                                                                                                                                                                                                                                                 |                                                                                                                          |
|                                    | Qualitative synthesis strategy                   | Describe methods used for synthesising qualitative data and justify your                                                                                                                                             | Compulsory (if qualitative synthesis performed)                                                                                                                                         | Checklist           | Yes                                                                                                                                                                                                                                                                 |                                                                                                                          |
|                                    | Other synthesis strategies                       | Describe any other approaches used for synthesising data or combining                                                                                                                                                | Compulsory (if other synthesis performed)                                                                                                                                               | Checklist           | n/a                                                                                                                                                                                                                                                                 |                                                                                                                          |
|                                    | Assessment of risk of publication                | Describe methods for examining the possible influence of publication                                                                                                                                                 | This may be done for quantitative syntheses using diagnostic plots or                                                                                                                   | Checklist           | Yes                                                                                                                                                                                                                                                                 |                                                                                                                          |
|                                    | Knowledge gap and cluster                        | Describe the methods used to identify and/or prioritise key knowledge                                                                                                                                                | Optional                                                                                                                                                                                | Checklist           | n/a                                                                                                                                                                                                                                                                 |                                                                                                                          |
| Results                            | Demonstrating procedural independence            | Describe the role of systematic reviewers (who have also authored articles to be considered within the review) in decisions regarding inclusion or critical appraisal of their own work.                             | Reviewers who have authored articles to be considered within the review should be prevented from unduly influencing inclusion decisions, for example by delegating tasks appropriately. | Checklist           | Yes                                                                                                                                                                                                                                                                 | The subset of authors who are reviewing articles for inclusion do not have any published studies included in the review. |
|                                    | Description of review process                    | Describe the review process including the volume of evidence identified                                                                                                                                              |                                                                                                                                                                                         | Checklist           | Yes                                                                                                                                                                                                                                                                 |                                                                                                                          |
|                                    | Number of search results                         | Provide the number of search results from bibliographic databases                                                                                                                                                    | This number should not include web-based search engine or organisational website searches: this will help assessment of the efficiency of the primary search string.                    | Meta-data           | 94,672                                                                                                                                                                                                                                                              |                                                                                                                          |
|                                    | Number of search results after duplicate removal | Provide the total number of search results from bibliographic database searches following duplicate removal.                                                                                                         |                                                                                                                                                                                         | Meta-data           | See methods section                                                                                                                                                                                                                                                 |                                                                                                                          |
|                                    | Full text screening excludes                     | Additional file containing list of and reasons for full text exclusions.                                                                                                                                             |                                                                                                                                                                                         | Checklist           | Yes                                                                                                                                                                                                                                                                 |                                                                                                                          |
|                                    | Title screening results                          | Provide the number of articles retained following title screening.                                                                                                                                                   | Optional if screening titles and abstracts together                                                                                                                                     | Meta-data           | 12,098                                                                                                                                                                                                                                                              |                                                                                                                          |
|                                    | Abstract screening results                       | Provide the number of articles retained following abstract screening.                                                                                                                                                | Optional if screening titles and abstracts together                                                                                                                                     | Meta-data           | n/a                                                                                                                                                                                                                                                                 |                                                                                                                          |

|              |                                      |                                                                            |                                                                         |           |     |     |
|--------------|--------------------------------------|----------------------------------------------------------------------------|-------------------------------------------------------------------------|-----------|-----|-----|
|              | Title and abstract screening results | Provide the number of articles retained following title and abstract       | Optional if screening titles and abstracts separately                   | Meta-data | n/a |     |
|              | Retrieval results                    | Provide the number of articles retrieved at full text.                     |                                                                         | Meta-data |     | 842 |
|              | Unobtainable articles                | Additional file containing list of unobtainable articles.                  |                                                                         | Checklist | Yes |     |
|              | Full text screening results          | Provide the number of articles retained following full text screening.     |                                                                         | Meta-data |     | 315 |
|              | Consistency checking: screening      | Results of consistency checking at all stages (screening, data extraction, |                                                                         | Checklist | Yes |     |
|              | Critical appraisal exclusions        | If any studies are excluded due to low validity, provide the number of     | Compulsory for any studies not included in synthesis due to validity.   | Meta-data | n/a |     |
|              | Narrative synthesis                  | Describe the body of evidence identified using figures and tables,         |                                                                         | Checklist | Yes |     |
|              | Extracted data                       | Additional file containing extracted quantitative or qualitative data      |                                                                         | Checklist | Yes |     |
|              | Systematic map database              | Additional file containing meta-data and coding for included studies.      | Optional, a map database can be included within a systematic review     | Checklist | Yes |     |
|              | Quantitative synthesis               | Present results of quantitative synthesis of study findings (e.g. meta-    | Compulsory (if quantitative synthesis performed)                        | Checklist | Yes |     |
|              | Qualitative synthesis                | Present results of qualitative analysis of study findings (e.g. summaries  | Compulsory (if qualitative synthesis performed)                         | Checklist | Yes |     |
|              | Other synthesis                      | Present results of any other synthesis methods used.                       | Compulsory (if other synthesis performed)                               | Checklist | Yes |     |
|              | Risk of publication bias             | Describe the results of assessments for the possible influence of          | For quantitative syntheses this may be done using diagnostic plots or   | Checklist | Yes |     |
| Discussion   | Discussion                           | Discuss the review results and suggest further enquiry or analysis (e.g.   |                                                                         | Checklist | Yes |     |
|              | Limitations of the review            | Discuss possible limitations in the methods used.                          |                                                                         | Checklist | Yes |     |
|              | Limitations of the evidence base     | Discuss possible limitations in the evidence base.                         |                                                                         | Checklist | Yes |     |
| Conclusions  | Implications for                     | Summarise the state of the evidence base and discuss the way in which      | Reviews must not include practical environmental management             | Checklist | Yes |     |
|              | Implications for research            | Discuss the way in which the identified evidence may inform research       | In this section some advocacy for future research on the reviewed topic | Checklist | Yes |     |
| Declarations | Competing interests                  | Describe of any financial or non-financial competing interests that the    |                                                                         | Checklist | Yes |     |

#### References

[1] Bayliss, H.R., Haddaway, N.R., Eales, J., Frampton, G.K. and James, K.L., 2016. Updating and amending systematic reviews and systematic maps in environmental management. *Environmental Evidence*, 5(1), p.20.

[2] Haddaway, N.R., Kohl, C., da Silva, N.R., Schiemann, J., Spök, A., Stewart, R., Sweet, J.B. and Wilhelm, R., 2017. A framework for stakeholder engagement during systematic reviews and maps in environmental management. *Environmental Evidence*, 6(1), p.11.

[3] Collaboration for Environmental Evidence. 2018. Guidelines and Standards for Evidence synthesis in Environmental Management. Version 5.0. [www.environmentalevidence.org/information-for-authors](http://www.environmentalevidence.org/information-for-authors).

[4] Leeds Institute of Health Sciences. [https://medhealth.leeds.ac.uk/info/639/information\\_specialists/1500/search\\_concept\\_tools](https://medhealth.leeds.ac.uk/info/639/information_specialists/1500/search_concept_tools). Accessed 12/11/2017.
